# Supplementary material for: Clinical Features and Outcomes of Critically Ill Patients with Coronavirus Disease 2019 (COVID19): A Multicenter Cohort Study
Source: Research Square preprint supplement (doi:10.21203/rs.3.rs-129353/v1), 2020-12-17
Supplement: Supplementary file 1 [file ff3907ac691b39e128aa465a.docx]

Table 3, supplementary material, Complication (s) during ICU stay

| Complication during ICU stay | All patients(N=560) | ICU mortality within 30 Days | | | | | Thrombosis During ICU | | | | |
| --- | --- | --- | --- | --- | --- | --- | --- | --- | --- | --- | --- |
| Yes  (N=237) | No  (N=323) | P-value | OR (95%CI) | P-value | Yes  (N=64) | No  (N=496) | P-value | OR (95%CI) | P-value$ |
| Respiratory Failure/ARDS, n (%) | 400 ( 71.4 ) | 220 ( 92.8 ) | 180 ( 55.7 ) | <.0001^^ | 6.1( 3.32 - 11.05) | <.0001 | 57 ( 89.1 ) | 343 ( 69.2 ) | 0.0005^^ | 4.1( 1.41 - 12.00) | 0.0097 |
| Acute Kidney Injury – During ICU stay n (%) | 261 (46.8 ) | 177 (74.7) | 84(26.2) | <.0001** | 4.3 (2.77-6.64) | <.0001 | 40 ( 62.5 ) | 221 ( 44.6 ) | <.0001 | 1.7( 0.87 - 3.34) | 0.1231 |
| Liver Injury, n (%) | 40 ( 7.1 ) | 27 ( 11.4 ) | 13 ( 4.0 ) | 0.0013** | 2.2( 1.02 - 4.81) | 0.0435 | 5 ( 7.8 ) | 35 ( 7.1 ) | 0.7941** | 1.1( 0.39 - 2.93) | 0.9024 |
| Disseminated Intravascular Coagulation (DIC) , n (%) | 8 ( 1.4 ) | 8 ( 3.4 ) | 0 | 0.0010** | NC | - | 6 ( 9.4 ) | 2 ( 0.4 ) | <.0001** | 27.1( 5.10 - 144.3) | 0.0001 |
| Thrombosis During ICU, n (%) | 64 (11.4 ) | 33 ( 13.9 ) | 31 ( 9.6 ) | 0.1119^^ | 0.9( 0.45 - 1.62) | 0.6342 | NA | | | | |

-Denominator of the percentage is the total number of patients
*T -Test / ^ Wilcoxon rank sum test is used to calculate the P-value.
**Fisher Exact /^^Chi-square test is used to calculate the P-value.

$ Multivariate logistic regression is used to calculate odds ratio and p-value after adjusting for patients baseline APACHE II, NUTRIC and SOFA scores.
